# Supplementary material for: Weighted Gene Co-expression Network Analysis of Endometriosis and Identification of Functional Modules Associated With Its Main Hallmarks
Source: PubMed Central journal article supplement (PMC6194152; doi:10.3389/fgene.2018.00453), 2018-10-12
Supplement: Data_Sheet_1.pdf [file Data_Sheet_1.pdf]

```

rm(list=ls())

#####
rm(list=ls())
load(file = "0-gset_GEO.RData")
load(file = "0-NoSe.RData")
load(file = "0-NoMi.RData")

# The negative Fc = expression is higher in Normal, Threshod=1.5
Filter_NS <- row.names(subset(NoSe, abs(logFC) > 0.18 & adj.P.Val <
0.05))

Filter_NM <- row.names(subset(NoMi, abs(logFC) > 0.18 & adj.P.Val <
0.05))

shared =as.data.frame(merge(Filter_NM,Filter_NS,by=1,sort=F)[,1])      #
Or shared=intersect(Filter_NM,Filter_NS)
row.names(shared) <- shared[,1]

expression= as.data.frame(exprs(gset))

myData_Normalized_Expr_Filt =merge(expression,shared,by = "row.names",
all = F)
row.names(myData_Normalized_Expr_Filt)=myData_Normalized_Expr_Filt[,1]
rem <- c("Row.names", "merge(Filter_NM, Filter_NS, by = 1, sort = F)[,
1]")
myData_Normalized_Expr_Filt = myData_Normalized_Expr_Filt[ ,
!(names(myData_Normalized_Expr_Filt) %in% rem)]
dim(myData_Normalized_Expr_Filt)

#####

##### Convert Affymetrix ID to gene SYMBOL or ENTREZID or
GENENAME. select(hg133plus2.db, PROBES, c("SYMBOL", "ENTREZID",
"GENENAME"))
library("hg133plus2.db")

SYMBOL <- data.frame(SYMBOL=sapply(contents(hg133plus2SYMBOL), paste,
collapse=", ") )

myData_Normalized_Expr_Filt_Symbol <- merge(SYMBOL,
myData_Normalized_Expr_Filt, by.x=0, by.y=0, all.y=T)
row.names(myData_Normalized_Expr_Filt_Symbol) <-
myData_Normalized_Expr_Filt_Symbol[,1]
myData_Normalized_Expr_Filt_Symbol <-
myData_Normalized_Expr_Filt_Symbol[, -1]

#####

```

```

##### Average genes with several probset by collapseRows of
WGCNA
library(WGCNA)

datET <- myData_Normalized_Expr_Filt_Symbol[,-1]
rowGroup <- myData_Normalized_Expr_Filt_Symbol[,1]
rowID <- rownames(datET)

collapse.object=collapseRows(datET=datET, rowGroup=rowGroup,
rowID=rowID,method="MaxMean") # method="maxRowVariance" or MaxMean

myData_Normalized_Expr_Filt_Symbol_Coll=data.frame(
collapse.object$group2row, collapse.object$datETcollapsed)
myData_Normalized_Expr_Filt_Symbol_Coll=myData_Normalized_Expr_Filt_Symbol_Coll[, -c(1,2)]

#####

##### WGCNA
allowWGCNAThreads()
suppressMessages(library(cluster))
options(stringsAsFactors = FALSE);

drops=c("GSM1256795", "GSM1256794", "GSM1256792", "GSM1256790", "GSM1256789",
"GSM1256783", "GSM1256765", "GSM1256764", "GSM1256763", "GSM1256762", "GSM1256
761", "GSM1256760", "GSM1256759", "GSM1256758", "GSM1256757", "GSM1256756", "GS
M1256755", "GSM1256754", "GSM1256753", "GSM1256752", "GSM1256751", "GSM1256750
", "GSM1256749", "GSM1256748", "GSM1256747", "GSM1256746", "GSM1256745", "GSM12
56744", "GSM1256743", "GSM1256742", "GSM1256741", "GSM1256740", "GSM1256739", "
GSM1256738", "GSM1256737", "GSM1256736", "GSM1256735.CEL", "GSM1256696", "GSM1
256702")
df =
myData_Normalized_Expr_Filt_Symbol_Coll[,!(names(myData_Normalized_Expr_F
ilt_Symbol_Coll) %in% drops)]
datExpr = as.data.frame(t(df))

##### Outlier detection
A = adjacency(t(datExpr), type = "distance")
k = as.numeric(apply(A, 2, sum)) - 1
Z.k = scale(k)
thresholdZ.k = -2.5 # often -2.5
outlierColor = ifelse(Z.k < thresholdZ.k, "red", "black")
sampleTree = hclust(as.dist(1 - A), method = "average")
datColors = data.frame(outlierC = outlierColor)

##### Remove outlying samples from expression data
remove.samples = Z.k < thresholdZ.k | is.na(Z.k)
datExpr = datExpr[!remove.samples, ]

```

```

A = adjacency(t(datExpr), type = "distance")
k = as.numeric(apply(A, 2, sum)) - 1
Z.k = scale(k)
#####
#####

##### Divide disease and normal samples
load(file = "4-datExpr_RemSam.RData")

# Remove "GSM1256685" "GSM1256686"
datExpr_m =
as.data.frame(datExpr[c("GSM1256778", "GSM1256776", "GSM1256775", "GSM125677
4", "GSM1256718", "GSM1256715", "GSM1256713", "GSM1256708", "GSM1256706", "GSM1
256705", "GSM1256700", "GSM1256698", "GSM1256694", "GSM1256693", "GSM1256692",
"GSM1256691", "GSM1256690", "GSM1256689", "GSM1256688", "GSM1256684", "GSM1256
683", "GSM1256682", "GSM1256677", "GSM1256674", "GSM1256672"), ])

# Remove "GSM1256678" "GSM1256679"
datExpr_s = as.data.frame(datExpr[c(
"GSM1256782", "GSM1256781", "GSM1256780", "GSM1256779", "GSM1256777", "GSM1256
773", "GSM1256719", "GSM1256717", "GSM1256716", "GSM1256714", "GSM1256712", "GS
M1256711", "GSM1256710", "GSM1256709", "GSM1256707", "GSM1256704", "GSM1256703
", "GSM1256701", "GSM1256699", "GSM1256697", "GSM1256695", "GSM1256687", "GSM12
56681", "GSM1256680", "GSM1256676", "GSM1256675", "GSM1256673", "GSM1256671", "
GSM1256670", "GSM1256669", "GSM1256668", "GSM1256667", "GSM1256666", "GSM12566
65", "GSM1256664", "GSM1256663", "GSM1256662", "GSM1256661", "GSM1256660", "GSM
1256659", "GSM1256658", "GSM1256657", "GSM1256656", "GSM1256655", "GSM1256654"
, "GSM1256653"), ])

datExpr_n =
as.data.frame(datExpr[c("GSM1256800", "GSM1256799", "GSM1256798", "GSM125679
7", "GSM1256796", "GSM1256793", "GSM1256791", "GSM1256788", "GSM1256787", "GSM1
256786", "GSM1256785", "GSM1256784", "GSM1256772", "GSM1256771", "GSM1256770",
"GSM1256769", "GSM1256768", "GSM1256767", "GSM1256766", "GSM1256734", "GSM1256
733", "GSM1256732", "GSM1256731", "GSM1256730", "GSM1256729", "GSM1256728", "GS
M1256727", "GSM1256726", "GSM1256725", "GSM1256724", "GSM1256723", "GSM1256722
", "GSM1256721", "GSM1256720"), ])

# Check the matrix

multi=list(Data1=list(data=datExpr_n),
Data2=list(data=datExpr_s), Data3=list(data=datExpr_m))
multi_g=goodSamplesGenesMS(multi)

datExpr_n=datExpr_n[,multi_g$goodGenes]
goodSamplesGenes(datExpr_n)

datExpr_s=datExpr_s[,multi_g$goodGenes]
goodSamplesGenes(datExpr_s)

```

```

datExpr_m=datExpr_m[,multi_g$goodGenes]
goodSamplesGenes (datExpr_m)

##### Choose a set of soft-thresholding powers
load(file ="4-datExpr_n.RData")
load(file ="4-datExpr_s.RData")
load(file ="4-datExpr_m.RData")

library(WGCNA)
allowWGCNAThreads()
suppressMessages(library(cluster))
options(stringsAsFactors = FALSE);

powers = c(c(1:10), seq(from = 12, to=30, by=1))
sft = pickSoftThreshold(datExpr_n, powerVector = powers,
networkType="signed", corFnc = "bicor", verbose = 5,blockSize=17000) #
corFnc = "bicor" Or corFnc = cor, corOptions = list(use = 'p')

sizeGrWindow(9, 5)
par(mar=c(6,8,4,4)) #c(bottom, left, top, right)
par(mfrow = c(1,2));
cex1 = 0.9;

plot(sft$fitIndices[,1], -
sign(sft$fitIndices[,3])*sft$fitIndices[,2],xlab="Soft Threshold
(power)",ylab="Scale Free Topology Model Fit,signed R^2",type="n", main =
paste("Scale independence"));
text(sft$fitIndices[,1], -
sign(sft$fitIndices[,3])*sft$fitIndices[,2],labels=powers,cex=cex1,col="r
ed");
abline(h=0.80,col="red")

plot(sft$fitIndices[,1], sft$fitIndices[,5], xlab="Soft Threshold
(power)",ylab="Mean Connectivity", type="n", main = paste("Mean
connectivity"))
text(sft$fitIndices[,1], sft$fitIndices[,5], labels=powers,
cex=cex1,col="red")

#####

##### Comparison of mean expression level and connectivity
between two data

Data1_mean = as.data.frame((t(datExpr_n)[, -c(1:1)]));
rownames(Data1_mean) = names(datExpr_n);

Data2_mean = as.data.frame((t(datExpr_s)[, -c(1:1)]));

```

```

rownames(Data2_mean) = names(datExpr_s);

Data3_mean = as.data.frame((t(datExpr_m)[, -c(1:1)]));
rownames(Data3_mean) = names(datExpr_m);

par(mfrow=c(1,3))
par(mar=c(6,6,4,4))      #c(bottom, left, top, right)

mean.Data1=apply(Data1_mean,1,mean)
mean.Data2=apply(Data2_mean,1,mean)
mean.Data3=apply(Data3_mean,1,mean)

#plot the result between Data1 and Data2
verboseScatterplot(mean.Data1,mean.Data3,corFnc = "bicor",xlab="Normal",
ylab="Mild", abline =TRUE,abline.color=2,abline.lty =5)
verboseScatterplot(mean.Data1,mean.Data2,corFnc =
"bicor",xlab="Normal",ylab="Severe", abline
=TRUE,abline.color=2,abline.lty =5)
verboseScatterplot(mean.Data3,mean.Data2,corFnc =
"bicor",xlab="Mild",ylab="Severe", abline =TRUE,abline.color=2,abline.lty
=5)

title("Mean expression comparison", outer=TRUE,line = -1)
#####

##### Explores the preservation of connectivity between two data

par(mfrow=c(1,3))
par(mar=c(6,6,4,4))      #c(bottom, left, top, right)

sftData1=softConnectivity(datExpr_n,corFnc = "bicor",type = "signed",
blockSize =17000,minNSamples=5, power=13 )      # nedd power by
pickSoftThreshold
sftData2=softConnectivity(datExpr_s,corFnc = "bicor",type = "signed",
blockSize =17000,minNSamples=5, power=16)
sftData3=softConnectivity(datExpr_m,corFnc = "bicor",type = "signed",
blockSize =17000,minNSamples=5, power=30)

#plot the result between Data1 and Data2
verboseScatterplot(sftData1,sftData3,type = "signed", corFnc = "bicor",
blockSize = 15000, xlab="Normal", ylab="Mild", abline
=TRUE,abline.color=2,abline.lty =5)
verboseScatterplot(sftData1,sftData2,type = "signed", corFnc =
"bicor",blockSize = 15000, xlab="Normal",ylab="Severe", abline
=TRUE,abline.color=2,abline.lty =5)
verboseScatterplot(sftData3,sftData2,type = "signed", corFnc =
"bicor",blockSize = 15000, xlab="Mild",ylab="Severe", abline
=TRUE,abline.color=2,abline.lty =5)

#####

```

```
##### Module detection. Power and other things have to be set
net1 = blockwiseModules(datExpr_n, power = 13, corType= "bicor",
networkType = "signed", TOMType = "signed", maxBlockSize=17000,
minModuleSize = 30, reassignThreshold = 0, mergeCutHeight = 0.25,
numericLabels = TRUE, pamRespectsDendro = FALSE, saveTOMs = TRUE,
saveTOMFileBase = "5-Data1TOM", nThreads = 6, verbose = 3)
table(net1$colors)
```

```
# open a graphics window
sizeGrWindow(12, 9)
# Convert labels to colors for plotting
mergedColors = labels2colors(net1$colors)
# Plot the dendrogram and the module colors underneath
plotDendroAndColors(net1$dendrograms[[1]],
mergedColors[net1$blockGenes[[1]]], "Module colors", dendroLabels =
FALSE, hang = 0.03, addGuide = TRUE, guideHang = 0.05,
main="Gene hierarchical clustering dendrogram
(Normal) " )
```

```
#####
```

```
##### Save the modules Data1
probes=names(datExpr_n)

moduleLabelsAutomatic1 = net1$colors
moduleColorsAutomatic1 = labels2colors(moduleLabelsAutomatic1)
moduleColorsAutomaticData1=moduleColorsAutomatic1

modules=paste(probes,net1$colors,moduleColorsAutomatic1,sep=",")
write.csv(modules, file = "6-Modules.csv", sep="," ,quote = FALSE,
row.names = FALSE)
#####
```

```
##### Normal vs Severe
multiColor=list(Data1=moduleColorsAutomaticData1)
setLabels = c("Data1", "Data2")
multiExpr=list(Data1=list(data=datExpr_n), Data2=list(data=datExpr_s))
```

```
nPermutations1=200
```

```

set.seed(1)
system.time({ mp_s = modulePreservation(multiExpr,
multiColor,networkType= "signed",corFnc= "bicor", referenceNetworks = 1,
nPermutations = nPermutations1, randomSeed = 1, quickCor = 0,
maxModuleSize=5000, verbose = 3) })
save(mp_s, file = "7-modulePreservation_s.RData")
#####

##### Mmodule preservation results ## Excel

# specify the reference and the test networks
ref=1; test = 2

statsObs= cbind(mp_s$quality$observed[[ref]][[test]][,-
1],mp_s$preservation$observed[[ref]][[test]][,-1])
statsZ= cbind(mp_s$quality$Z[[ref]][[test]][,-
1],mp_s$preservation$Z[[ref]][[test]][,-1]);
moduleSize=mp_s$preservation$Z[[ref]][[test]]$moduleSize
log.p=mp_s$preservation$log.p[[ref]][[test]][,-1]

QualityStats=print( cbind(moduleSize ,statsObs[, c("medianRank.pres",
"medianRank.qual")],signif(statsZ[, c("Zsummary.pres",
"Zsummary.qual")],2),signif(log.p[,c("log.psummary.pres")],2)))
#####

##### Mmodule preservation results ## Plot
Obs.PreservationStats= mp_s$preservation$observed[[ref]][[test]]
Z.PreservationStats=mp_s$preservation$Z[[ref]][[test]]

modColors = rownames(Obs.PreservationStats)
moduleSize = Obs.PreservationStats$moduleSize

selectModules = !(modColors %in% c("grey", "gold"))
point.label = modColors[selectModules]

medianRank=Obs.PreservationStats$medianRank.pres
Zsummary=Z.PreservationStats$Zsummary.pres
par(mfrow=c(1,2),mar = c(4.5,4.5,2.5,1))

plot(moduleSize[selectModules],medianRank[selectModules],col=1,
bg=modColors[selectModules],pch = 21,main="MedianRank Preservation", cex
= 2, ylab = "MedianRank",xlab="Module size", log="x")
labelPoints(moduleSize[selectModules],medianRank[selectModules],point.lab
el,cex=1,offs=0.03)
abline(h=8, col = "red", lty = 2);

```

```

plot(moduleSize[selectModules],Zsummary[selectModules], col = 1,
bg=modColors[selectModules],pch = 21,main="Zsummary preservation",
cex=2,ylab = "Zsummary", xlab = "Module size", log = "x")
labelPoints(moduleSize[selectModules],Zsummary[selectModules],point.label
,cex=1,offs=0.03)
abline(h=5, col = "red", lty = 2)

```

```
#####
```

```
##### Normal vs Mild
multiColor=list(Data1=moduleColorsAutomaticData1)
setLabels = c("Data1", "Data2")
multiExpr=list(Data1=list(data=datExpr_n), Data2=list(data=datExpr_m))

```

```
nPermutations1=200
```

```
set.seed(1)
system.time({ mp_m = modulePreservation(multiExpr, multiColor,
networkType= "signed",corFnc= "bicor", referenceNetworks = 1,
nPermutations = nPermutations1, randomSeed = 1, quickCor =
0,maxModuleSize=5000, verbose = 3 ) })
save(mp_m, file = "9-modulePreservation_m.RData")
#####

```

```
##### Mmodule preservation results ## Excel
ref=1; test = 2
```

```
statsObs= cbind(mp_m$quality$observed[[ref]][[test]][,-
1],mp_m$preservation$observed[[ref]][[test]][,-1])
statsZ= cbind(mp_m$quality$Z[[ref]][[test]][,-
1],mp_m$preservation$Z[[ref]][[test]][,-1]);
moduleSize=mp_m$preservation$Z[[ref]][[test]]$moduleSize
log.p=mp_m$preservation$log.p[[ref]][[test]][,-1]

```

```
QualityStats=print( cbind(moduleSize ,statsObs[, c("medianRank.pres",
"medianRank.qual")],signif(statsZ[, c("Zsummary.pres",
"Zsummary.qual")],2),signif(log.p[,c("log.psummary.pres")],2)))
#####

```

```
##### Mmodule preservation results ## Plot
Obs.PreservationStats= mp_m$preservation$observed[[ref]][[test]]
Z.PreservationStats=mp_m$preservation$Z[[ref]][[test]]
modColors = rownames(Obs.PreservationStats)
moduleSize = Obs.PreservationStats$moduleSize

```



```

selectModules = !(modColors %in% c("grey", "gold"))
point.label = modColors[selectModules]

medianRank=Obs.PreservationStats$medianRank.pres
Zsummary=Z.PreservationStats$Zsummary.pres
par(mfrow=c(1,2),mar = c(4.5,4.5,2.5,1))
plot(moduleSize[selectModules],medianRank[selectModules],col=1,
bg=modColors[selectModules],pch = 21,main="MedianRank Preservation", cex
= 2, ylab ="MedianRank",xlab="Module size", log="x")
labelPoints(moduleSize[selectModules],medianRank[selectModules],point.lab
el,cex=1,offs=0.03)
abline(h=8, col = "red", lty = 2);
plot(moduleSize[selectModules],Zsummary[selectModules], col = 1,
bg=modColors[selectModules],pch = 21,main="Zsummary Preservation",
cex=2,ylab ="Zsummary", xlab = "Module size", log = "x")
labelPoints(moduleSize[selectModules],Zsummary[selectModules],point.label
,cex=1,offs=0.03)
abline(h=5, col = "red", lty = 2)

```

```
#####
```

```
##### Module membership analysis, kME
```

```

moduleLabelsAutomatic1 = net1$colors
moduleColorsAutomatic1 = labels2colors(moduleLabelsAutomatic1)
moduleColorsAutomaticData1=moduleColorsAutomatic1

```

```

load(file ="4-datExpr_n.RData")
load(file ="4-datExpr_s.RData")
load(file ="4-datExpr_m.RData")

```

```

ME.Data1=moduleEigengenes (datExpr_n,moduleColorsAutomaticData1)$eigengene
s
ME.Data2=moduleEigengenes (datExpr_s,moduleColorsAutomaticData1)$eigengene
s
ME.Data3=moduleEigengenes (datExpr_m,moduleColorsAutomaticData1)$eigengene
s

```

```

kME_Normal=signedKME (datExpr_n,ME.Data1,corFnc = "bicor")
kME_Severe=signedKME (datExpr_s,ME.Data2,corFnc = "bicor")
kME_Mild=signedKME (datExpr_m,ME.Data3,corFnc = "bicor")

```

```
genename = names (datExpr_n)
```

```

kME_red=as.data.frame(cbind(kME_Normal$kMERed,kME_Severe$kMERed,kME_Mild$
kMERed))
colnames(kME_red)= c("kME_Normal","kME_Severe","kME_Mild")
row.names(kME_red)=names(datExpr_n)
inModule = (moduleColorsAutomaticData1=="red")
kME_red=kME_red[inModule,]

# Plot between different treatments
par(mfrow=c(5,6))
par(mar=c(2,4,3,2))      #c(bottom, left, top, right)

verboseScatterplot(kME_red$kME_Normal, kME_red$kME_Severe,corFnc =
"cor",xlab="Normal", ylab="Severe", abline
=TRUE,abline.color=2,abline.lty =5, font=1,font.lab=1,font.main=1)
verboseScatterplot(kME_red$kME_Normal, kME_red$kME_Mild,corFnc =
"cor",xlab="Normal", ylab="Mild", abline =TRUE,abline.color=2,abline.lty
=5, font=1,font.lab=1,font.main=1)
verboseScatterplot(kME_red$kME_Severe, kME_red$kME_Mild,corFnc =
"cor",xlab="Mild", ylab="Severe", abline =TRUE,abline.color=2,abline.lty
=5, font=1,font.lab=1,font.main=1)

title("Module membership for turquoise module", outer=TRUE,line = -1)

par (mfrow=c(1,1), mar=c(3.5, 3.5, 2, 1), mgp=c(2.4, 0.8, 0), las=1)

ME_pink=as.data.frame(cbind(ME.Data1$MEpink,ME.Data2$MEpink,ME.Data3$MEpi
nk))
colnames(ME_pink)= c("ME_Normal","ME_Severe","ME_Mild")

#####

##### Intramodular connectivity (kIM)

kIM_Normal=intramodularConnectivity.fromExpr(datExpr_n,
moduleColorsAutomaticData1,corFnc = "bicor",networkType = "signed",
scaleByMax=TRUE,power=13)$kWithin
kIM_Severe=intramodularConnectivity.fromExpr(datExpr_s,
moduleColorsAutomaticData1,corFnc = "bicor",networkType = "signed",
scaleByMax=TRUE,power=16)$kWithin
kIM_Mild=intramodularConnectivity.fromExpr(datExpr_m,
moduleColorsAutomaticData1,corFnc = "bicor",networkType = "signed",
scaleByMax=TRUE,power=30)$kWithin

kIM=as.data.frame(cbind(kIM_Normal, kIM_Severe, kIM_Mild))

```

```
colnames(kIM)= c("kIM_Normal","kIM_Severe","kIM_Mild")
row.names(kIM)=names(datExpr_n)
```

```
inModule = (moduleColorsAutomaticData1=="yellow")
kIM_yellow=kIM[inModule,]
write.table(kIM_yellow,"kIM_yellow.txt")
```

```
par(mfrow=c(1,3))
par(mar=c(8,4,8,4))      #c(bottom, left, top, right)
```

```
verboseScatterplot(kIM_green$kIM_Normal,kIM_green$kIM_Severe,corFnc =
"bicolor",xlab="Normal", ylab="Severe", abline
=TRUE,abline.color=2,abline.lty =5)
verboseScatterplot(kIM_green$kIM_Normal,kIM_green$kIM_Mild,corFnc =
"bicolor",xlab="Normal", ylab="Mild", abline
=TRUE,abline.color=2,abline.lty =5)
verboseScatterplot(kIM_green$kIM_Mild,kIM_green$kIM_Severe,corFnc =
"bicolor",xlab="Mild", ylab="Severe", abline
=TRUE,abline.color=2,abline.lty =5)
title("Intramodular connectivity for green module", outer=TRUE,line = -1)
```

```
#####
```
