# Supplementary material for: Weighted Gene Co-expression Network Analysis of Endometriosis and Identification of Functional Modules Associated With Its Main Hallmarks
Source: PubMed Central journal article supplement (PMC6194152; doi:10.3389/fgene.2018.00453), 2018-10-12
Supplement: Data_Sheet_2.pdf [file Data_Sheet_2.pdf]

Supplementary Table 1: List of the primers used for RT-PCR experiments.

|   | <b>Name</b> | <b>Sequence (5' → 3')</b> | <b>Amplicon size (bp)</b> |
|---|-------------|---------------------------|---------------------------|
| 1 | STX18       | F: cagactccaagagatattcacg | 176                       |
|   |             | R: cacatcacgaggaagaagag   |                           |
| 2 | IGF-1       | F: gtgacattgctctcaacatctc | 128                       |
|   |             | R: aattgggttgaagactgct    |                           |
| 3 | IER3        | F: ggcaaagtaggagaagaaatgg | 133                       |
|   |             | R: acacagtagacagacggag    |                           |
| 4 | CYP11A1     | F: ccaaccagaacgattcct     | 89                        |
|   |             | R: ctgccgacttctcaacag     |                           |
| 5 | CC2D2A      | F: gattagacaagaggagaagtgg | 81                        |
|   |             | R: tttccaactttgcatagg     |                           |
| 6 | AEBP1       | F: gactactatgatggtgcgtg   | 130                       |
|   |             | R: aaatcgtcatggatgctgg    |                           |
| 7 | HOXB6       | F: acggttcaatgtagattcgc   | 114                       |
|   |             | R: gtagtatgtgctcctccagtg  |                           |
| 8 | MMP2        | F: gaaagatggtgtgcga       | 177                       |
|   |             | R: cttggttaggtgtaaagg     |                           |
