# Supplementary material for: Weighted Gene Co-expression Network Analysis of Endometriosis and Identification of Functional Modules Associated With Its Main Hallmarks
Source: Front Genet. 2018 Oct 12;9:453. doi: 10.3389/fgene.2018.00453 (PMC6194152; doi:10.3389/fgene.2018.00453)
Supplement: FILE S8 — List of target genes of ES differentially expressed miRNAs predicted by Ohlsson Teague et al. (2009) that were found in each non-preserved module. [file Data_Sheet_8.xlsx]

## Sheet: Sheet1
Supplementary file 8. list of target genes of ES diffrentially expressed miRNAspredicted by Ohlsson Teague et al.(2010) that were found in each module. Note that all module members were searched for targets.
turqouise	brown	yellow	green yellow	lightcyan	magenta	pink	purple	salmon
RPE	PPP1CC	ABHD4	UBTD1	CALD1	ATF7IP	PAN3	WDR26	BTAF1
FBXO3	API5	ACSL1	MMP2	STK38	SPTAN1	WSB1	RAP1B	CDYL
C5orf15	NASP	ACVR1B	PHC2	MEIS1	COL1A1	BAZ2B	ST8SIA4	DDIT4
RNF34	NPM1	AKAP13	PLK3	PGK1	MINK1	OGT	CORO1C	DMXL1
GNPDA2	XPO1	ALDOA	NBL1	SLC8A1	LENG8	NKTR	ELK3	KIAA0355
PCMT1	NCOA4	ANKRD9	PDGFRB	RGL1	NUP153	DMTF1	EDEM1	KIF3B
PDIK1L	RFX5	AP1G1	SULF1	PRKCA	DMPK	FNBP4	CREM	LGR4
SMNDC1	ITGA6	ARHGAP21	ELMO1		JUND	PMP22	PBX3	NEDD4L
SEH1L	WDR61	ARHGEF10L	ABL1		NUMBL	CHD9	RAP2C	NPC1
NUDCD1	CDK6	ARRDC4	LASP1		FLT1	MGEA5	MDFIC	OCLN
LIN7C	RBBP7	ATOH8	RDH10		PPP1R16B	CCNT2	MYO5A	RAB40C
RNF138	DEK	ATP8A2	TMPRSS3		POGZ	SLC25A27	CFL2	SESN1
CRKL	RCN2	BACH2	LAMC1		VAMP2	DGKH	RAP2A	SGPL1
PPAT	BCLAF1	BCL2L1	ARID3B		ITPKB	TNRC6A	CASC4	TP53INP1
THAP1	TARDBP	BTG2	SIT1		MBD6	TSC1	STAM	TPD52
MTPN	HMGN1	CAP1	AXL		GNB1	KLHL3	CDC37L1	VPS25
GNAI3	HSPD1	CDKN1A	SLC7A5		POMT2	GATAD2B	USP3	VPS37B
PDCD10	PSIP1	CHRD	SPARC		NUP210	RHOC	LOX
BRMS1L	AZIN1	CITED2	SLC40A1		SLC4A4	MARK3	PRKAR2B
USP38	TTC19	CORO2A	FAM78A		AFF1	PKD2	SMAP1
SUMO1	HMGB1	CPEB4	TSPAN18		DVL3	SDAD1	FLI1
ASB7	HSPE1	CRIM1	FGFR2		BRD2	UHRF2	KIF1B
NUP35	KPNA3	CTNNA1			LIMK1	ABCC5	ARPC5
SLC31A1	UBE2A	DEDD			HCN3	HOOK3	SH3BP5
UBE2V2	FKBP3	EPS8L2			FOXP1	AHCYL1	ARHGEF10
PDHX	TRIM37	FBXL16			RAB14	MAP3K2	ETV6
BRWD1	CLTC	FOXQ1			FNDC5	RAD23B	CAB39
CASP2	GDI2	FUT4			FAM57B	RRBP1	BACH1
NSF	DHX15	FXYD3				PHF1	GNG12
GABPA	COPS8	GJB1				DDX42	RND3
EML5	MASTL	GLRX				PCGF3	ABCB7
EI24	PTEN	HBP1				PLAGL1	PRKACB
E2F5	HMG20A	HOXB6				EIF4G3	FNDC3A
MIPOL1	PHC1	ID2				TNKS2	SDCBP
IMPAD1	LBR	IRS2				TNPO2	CAV1
MTFR1	KPNA2	JUP				SMURF2	ENPP5
SLC9A6	CPSF6	KIAA1217					ETS1
RSBN1	PCGF6	KLF15					ELMO2
FAM8A1	SEPHS1	KLF4					IL13RA1
RB1	TSPYL4	KLF9					TIMP2
GTF2B	PAPOLA	LLGL2					APBB2
ELF2	CCND2	MAL2					PRKCE
SOCS4	SFPQ	MAP7					RBMS1
TBPL1	DST	MASP1					TNFRSF21
UBE2E3	AKAP1	MEF2D					CHSY1
CSNK1A1	RASSF2	MGAT5B					PRDM1
NEDD1	KHDRBS1	MKL1					STARD13
TCEB1	PTGES3	MTMR3					CTBP2
GTF2E1	NHS	MXI1
PPP2CA	RAVER2	NCOA3
BLOC1S2	SRPK1	NDRG4
CAPN7	PODXL	NGEF
NFIB	EPC1	OSBP
MRPS27	H2AFZ	PAFAH1B1
SEC23A	PRICKLE2	PANX2
AP3S1	ATAD2	PC
ELOVL4	MAPRE1	PGRMC2
BCL2L2	MAT2A	PLEKHM1
CSNK1G3	PFN2	PPP1R11
YWHAB	NMT2	PTPRM
LSM11	TULP4	RAB11FIP1
ASF1A	PKP4	RAPH1
GOLGA5	KIF21A	RASD1
ZNF207	POGK	RBL2
LEMD3	PHTF2	RIOK3
MLF1	MAP1B	RRAS
UXS1	MYLK	RTKN
OCRL	HMGB3	SEMA4B
PRKRA	MYH10	SERPINE1
SEC24B	EDNRA	SH3BGRL3
TAF5	BLMH	SIPA1L2
PACRG	PLK2	SIRT7
WAC	DLC1	SLC38A2
UBE2Q1	CRISPLD1	SORCS2
ELOVL6	NRIP1	SSFA2
TMEM55A	ANLN	STARD8
RAP1GDS1	HMCN1	STAT3
BET1	STMN1	STIM1
ERG	FBXL2	TFEB
FZD1	MYB	TNFRSF1A
TLK2	ANK2	TOM1
NTN4	COL3A1	TP53INP2
DDX19A	RAB30	TPCN1
CCDC25	FNDC3B	TSPAN12
MBD5	MATR3	UBE2H
HIPK1	EPDR1	VAMP3
SNX16	CDH11	VAT1
SNX2	WHSC1	YWHAZ
YPEL5	VANGL1	ZBTB10
MFAP3	GCLC	ZDHHC18
UVRAG	CPM	ZFP36
ENSA	E2F7
USP46	MYLIP
GOLGA7	ZNF367
ADAMTS3	KIF23
VAPB	KIRREL
COIL	TFDP2
TUSC2	PER3
GLCE	PAK1
CNOT8	GAS2
SSR1	CAMTA1
AP3D1	PPP2R3A
WASF1	ADAMTS6
COPS2	MMP16
MBNL3	SYT1
AGPAT4	NETO2
SNAP23	SLITRK6
PUM1	SFRP1
YWHAG	SPRED1
SLC39A9	PPP2R2C
TDG	SMARCA4
SIAH1	TRIB2
ACSL3	PMAIP1
WDFY1	BTBD11
MAGI2	NPAS3
ZDHHC23	CCNE2
PPHLN1	KLF10
KCMF1	BCL11A
PPP2R5E	CCND1
EIF5A2	MMD
RBM7	DIO2
DR1	DNMT3A
SLC30A9	LEF1
ZDHHC21	SOX4
MTCH2	LRFN5
RNF41	PDGFC
PPP3CA	CDH2
ANKRD13C	LRRC3B
SERTAD3	COL11A1
FBXW11	FGF1
TAF12	DACH1
NR3C1	COL12A1
DMD	NOVA1
RECK	EPHA5
STX17	TBX3
ABCC4	MARCKS
SENP1	CXCL12
YY1	SUFU
KRAS	SEMA3A
XPO5	ICMT
PCNP	DNMT3B
INSIG1	GAS7
USP33	EPHB3
NECAP1	RAB6B
ZNF236	NME4
ANXA3	NAV1
UBE2D1	CASKIN1
ATRN	E2F1
SLC39A8	SOX12
PELI1	DPF1
TLE4	DNAJB5
RABIF	NRXN2
DYRK2	WDR62
SCAMP1	RAI1
SDHC	THRA
RBL1	FGD1
ARHGEF3	AMPD2
NFIA	ATF5
APC	SMARCD1
TOPORS	AP2S1
MEF2C	CACNA1G
NIPBL	ELK1
GAN	NCOR2
FEM1B	OAZ2
GRSF1	TJAP1
RANBP9	SYDE1
PDE7B	RBM15B
SDC2
CSNK2A1
FRMD6
GPAM
YTHDF3
HBS1L
GPHN
KDELC1
MFN1
STRN
CXorf23
ICK
NRF1
NUAK1
BTBD7
ZNF644
BNIP2
ELF1
UST
PPM1D
SMYD4
DDX19B
OSBPL11
FBXO21
ZNF25
NKRF
SGPP1
TMCC1
HDAC4
BCOR
PTGFRN
TMEM59
OXR1
SUMF1
SATB2
MRFAP1
EGLN1
ESRRG
NAB1
DERL1
PRDM10
PLCE1
UBE4B
AMPH
PCBP2
WDR44
SH3BP4
PPP1R3D
RGS7
CALML4
RABEP1
NBEA
ATP2B1
SKI
QKI
UBP1
CTNNB1
ATXN7
SPTLC2
PSD3
AEBP2
ITGB1
MBNL1
PLCB1
MBNL2
SHPRH
STX12
ADIPOR2
BAG4
FMR1
RB1CC1
HMGN3
SYAP1
SLC16A14
MPP5
FEM1C
PPP4R2
LRRC17
SEL1L
KLF11
MTMR4
TSC22D1
RNF11
ZNF281
PPP6C
PPARA
ADD3
PAIP2
PKNOX1
YTHDF2
MEIS2
EPC2
YWHAQ
STAG2
DLG3
GLIS3
TMEM65
ANKFY1
SLITRK4
DUSP6
FAM76B
DBT
FUT8
SNX4
STK39
LMAN2L
AKAP7
KPNA4
HMGCS1
GLIS2
CNOT4
SEMA6D
SETBP1
C6orf62
NEDD9
SOCS2
LETM1
EIF4EBP2
ENTPD7
SFMBT1
CUL3
NKIRAS1
SEMA3F
ARID4A
RNGTT
DERL2
ATP10D
UBE4A
FBXO28
PDHB
PAM
PPP3R1
CAV2
TSPAN13
EIF4E
JRKL
RYBP
ABCE1
M6PR
SIRT1
FAM76A
LRBA
USP37
PAFAH1B2
VCPIP1
FRMD4A
MYO6
DCBLD2
MAP2K4
SOCS6
PTPRG
EVI5
MAN1A2
ANKRD28
CDKN1B
ZNF503
ZFR
MAPK14
JMJD1C
FBXO8
EIF4E2
HACE1
SPATS2
GNAQ
PPP1R15B
SYNJ1
EIF1AX
GAB1
SEC63
TRIM2
ADAM9
OSBPL9
GOLGA1
TSC22D2
IREB2
PA2G4
SLC7A6
TRPS1
KLF12
ZBTB5
WEE1
EFNB2
DNAJB11
KCNS3
FAM46C
AKAP11
ITGAV
RNF13
TMEM50B
SP3
NR5A2
RLF
ITPR1
GNPNAT1
MTSS1
RALBP1
CCNG2
LYPLA1
RAB22A
SMARCC1
GRHL2
EAF1
DNAJC14
RAB11FIP2
VLDLR
TMOD2
BCL2
CPD
BPNT1
ADCY2
RASA1
ZC3H6
ANKRD27
IER3IP1
LPXN
SNX24
PPP2R5C
EIF2S1
ARIH2
PTPN4
ROCK2
TAF5L
LUZP1
PABPC1
NKIRAS2
RAPGEF4
PIN1
TCF12
CLCN3
SMARCAD1
MARK4
PRKAB2
ATP6V1G1
FBXL3
KLHL20
LIFR
PHF20
ADPGK
PAPOLG
ETV1
CTNNBIP1
MYO10
PELI2
ELOF1
TMCC3
MARK1
ITCH
GIT2
ARF4
ACBD3
SBF2
EPB41L3
CREBL2
TIPARP
PPM1E
HIC2
LAPTM4A
ZDHHC1
PHF20L1
BICD2
PAPD4
VPS4B
FBXW7
SLC16A1
LMO4
CDC42SE1
ANK3
SP1
NAP1L5
NRIP3
RALA
GAS2L1
ATXN1
PRKAR1A
PTP4A1
FZD4
SS18
RAB38
C9orf72
RPS6KB1
CRK
LPL
ULK2
TGOLN2
KTN1
SACM1L
SCD
NDEL1
ANGPT2
SYNJ2
CD47
TMEM55B
ASH2L
TMEM43
APPBP2
KCTD3
GTF2A1
AKT3
FOS
CDC42
GPC4
WDR48
NCOA2
CTTNBP2
MAP4K4
IRS1
SEPHS2
SYPL1
ZFP2
PHKG2
RIC8B
STXBP5
GNS
TTYH2
EPB41L4A
EPS15
HAS3
UBQLN1
VGLL4
MTUS1
TBC1D1
CDC14A
UBE2J1
PLP2
PTPN3
CNP
FBXW9
XRN1
BTBD10
PTPN12
SENP5
ARHGAP20
C1GALT1
NIPA1
ENTPD4
ARHGAP12
SASH1
ZNF217
JAG1
MORF4L1
RAB1A
PLS3
SLC37A3
NRP1
MNT
MAP6
HECA
HABP4
RASAL2
GLS
EHBP1
ARNT
SMCR8
HIVEP2
NR1H3
ETF1
MAP3K9
XKR8
ACBD5
CBX7
CALU
GPR146
KLHL2
USP12
HOXB4
ARHGAP1
RPS6KA1
DAAM1
